# Supplementary material for: Design and Evaluation of Two-Stage Membrane-Separation Processes for Propylene–Propane Mixtures
Source: MDPI journal article supplement (doi:10.3390/membranes12020163), 2022-01-29
Supplement: s1 [file s1]

Article

# Design and Evaluation of Two-Stage Membrane-Separation Processes for Propylene–Propane Mixtures

Takehiro Yamaki \*, Nguyen Thuy, Nobuo Hara, Satoshi Taniguchi and Sho Kataoka \*

Research Institute for Chemical Process Technology, National Institute of Advanced Industrial Science and Technology (AIST), AIST Tsukuba Central 5, 1-1-1 Higashi, Tsukuba 305-8565, Ibaraki, Japan; [nguyen.thuy@aist.go.jp](mailto:nguyen.thuy@aist.go.jp) (N.T.); [n-hara@aist.go.jp](mailto:n-hara@aist.go.jp) (N.H.); [taniguchi-satoshi@aist.go.jp](mailto:taniguchi-satoshi@aist.go.jp) (S.T.)

\* Correspondence: [takehiro-yamaki@aist.go.jp](mailto:takehiro-yamaki@aist.go.jp) (T.Y.); [s-kataoka@aist.go.jp](mailto:s-kataoka@aist.go.jp) (S.K.)

## Supplementary data

Figures S1 and S2 show the energy consumption and CO<sub>2</sub> emissions, respectively, of the membrane-separation process in Cases 1 and 2.

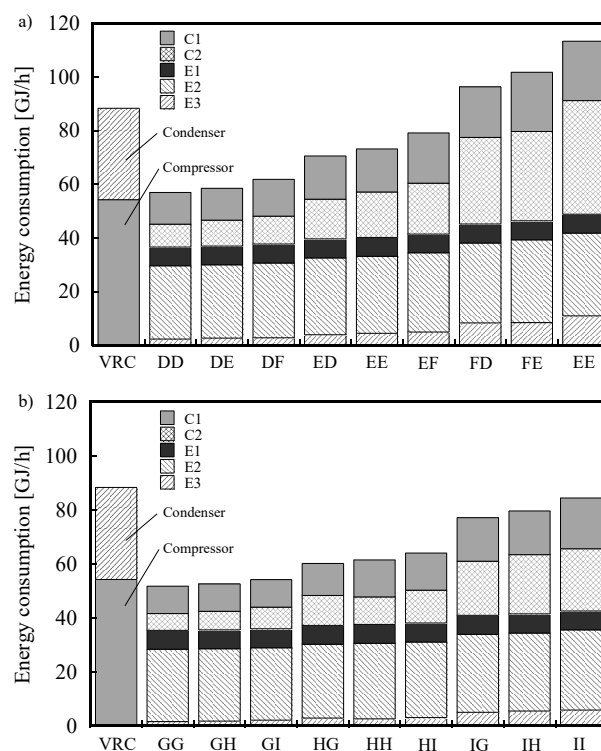

**Figure S1.** Energy consumptions of the two-stage membrane process with various combinations. (a) Case 1 and (b) Case 2.

**Citation:** Yamaki, T.; Thuy, N.; Hara, N.; Taniguchi, S.; Kataoka, S. Design and Evaluation of Two-Stage Membrane-Separation Processes for Propylene-Propane Mixtures. *Membranes* **2022**, *12*, 163.

<https://doi.org/10.3390/membranes12020163>

Academic Editor: Tomohisa Yoshiooka

Received: 27 December 2021

Accepted: 25 January 2022

Published: 29 January 2022

**Publisher's Note:** MDPI stays neutral with regard to jurisdictional claims in published maps and institutional affiliations.

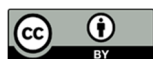

**Copyright:** © 2022 by the authors. Submitted for possible open access publication under the terms and conditions of the Creative Commons Attribution (CC BY) license (<https://creativecommons.org/licenses/by/4.0/>).

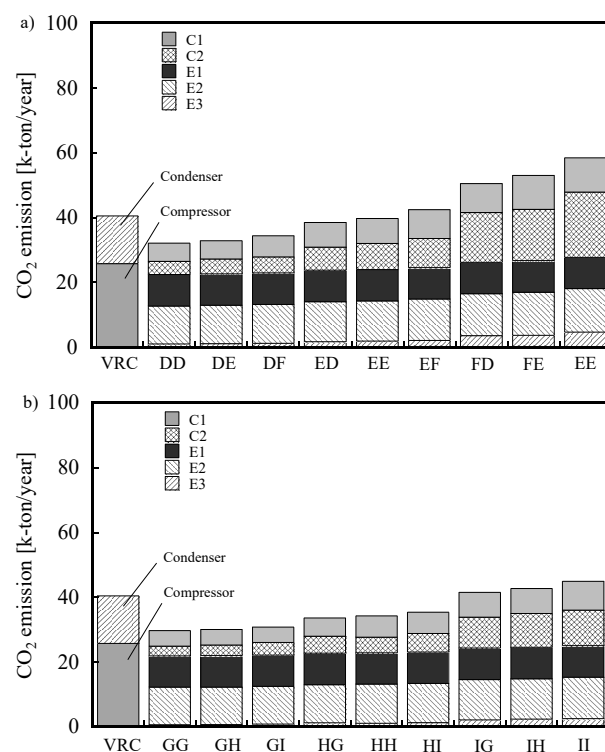

**Figure S2.** CO<sub>2</sub> emissions of the two-stage membrane process with various combinations. a) Case 1 and b) Case 2.

Figures S3 and S4 show the OPEX and CAPEX of the membrane-separation process for Cases 1 and 2, respectively.

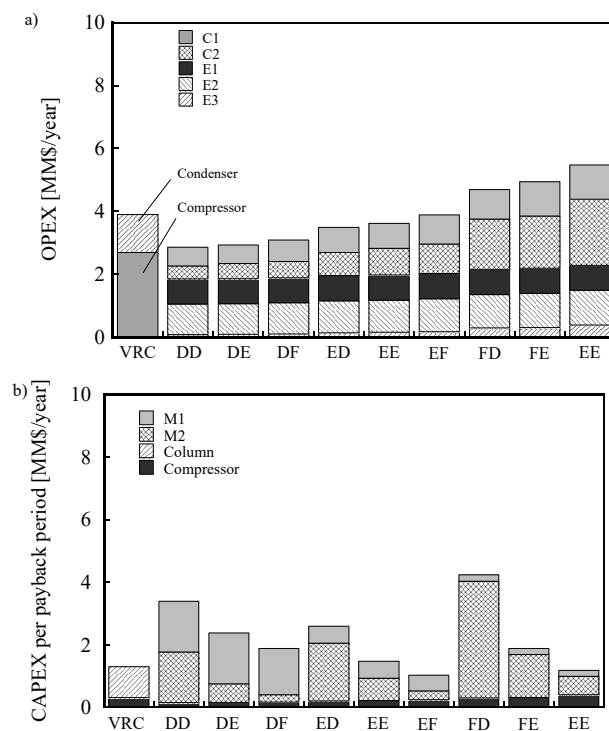

**Figure S3.** The production cost of the two-stage membrane process with various combinations of Case 1: a) OPEX and b) CAPEX per payback period. The payback period = 4 y.

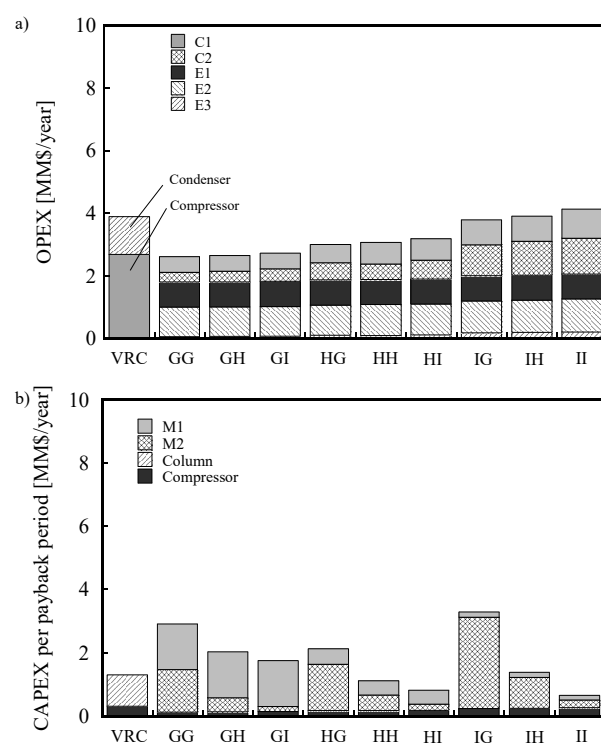

**Figure S4.** The production cost of the two-stage membrane process with various combinations of Case 2: a) OPEX and b) CAPEX per payback period. The payback period = 4 y.
